# Supplementary material for: Urinary Metabolomics Study of Patients with Gout Using Gas Chromatography-Mass Spectrometry
Source: Hindawi journal article supplement (doi:10.1155/2018/3461572), 2018-10-16
Supplement: f1 [file 3461572.f1.pdf]

# Urinary metabolomics study of patients with gouty arthritis using gas chromatography-mass spectrometry

Qianqian Li<sup>a,1</sup>, Shuangshuang Wei<sup>a,1</sup>, Dehong Wu<sup>b</sup>, Chengping Wen<sup>a,\*</sup>, Jia Zhou<sup>a,\*</sup>

<sup>a</sup> *College of Basic Medical, Zhejiang Chinese Medical University, 548 Binwen Road, Hangzhou 310053, China*

<sup>b</sup> *The Second Affiliated Hospital of Zhejiang Chinese Medical University, 318 Chaowang Road, , Hangzhou 310053, China*

<sup>1</sup>These authors contributed equally to this work

\*Corresponding authors:

Jia Zhou, Phone: 86-571-86613587; Fax: 86-571-86613587; E-mail: zhoujia@zcmu.edu.cn;

Chengping Wen, Phone: 86-571-86613131; Fax: 86-571-86613131; E-mail: wengcp@163.com

## Supplementary materials

Table S1 Significantly changed urinary metabolites in patients with gout

| Metabolite             | Retention Time (min) | PubChem ID | Identification Level <sup>a</sup> |
|------------------------|----------------------|------------|-----------------------------------|
| Ethanolamine           | 13.28                | 700        | 1                                 |
| Phenylethanolamine     | 27.2229              | 1000       | 2                                 |
| Glycolate              | 8.0842               | 5460308    | 1                                 |
| Glycerol               | 13.595               | 753        | 1                                 |
| Glycerate              | 15.0457              | 439194     | 1                                 |
| Stearate               | 34.2319              | 5281       | 1                                 |
| Succinate              | 14.6031              | 1110       | 1                                 |
| Fumarate               | 15.5835              | 444972     | 1                                 |
| Isoleucine             | 10.8297              | 6306       | 1                                 |
| Serine                 | 13.0235              | 5951       | 1                                 |
| Glycine                | 14.3231              | 750        | 1                                 |
| Threonine              | 14.0147              | 6288       | 1                                 |
| Aspartate              | 18.537               | 5960       | 2                                 |
| Pyroglutamate          | 19.6691              | 7405       | 1                                 |
| Phenylalanine          | 22.115               | 6140       | 1                                 |
| Propylene glycol       | 6.0702               | 1030       | 2                                 |
| 5-hydroxy-l-tryptophan | 26.9568              | 144        | 2                                 |
| L-Tryptophan           | 33.3073              | 6305       | 1                                 |

|                           |         |          |   |
|---------------------------|---------|----------|---|
| 5-Hydroxyindole-3-acetate | 33.6341 | 1826     | 2 |
| Beta-lactate              | 9.9734  | 91435    | 2 |
| Threonate                 | 20.3778 | 151152   | 2 |
| D-lyxose                  | 23.0948 | 439240   | 1 |
| Ribitol                   | 24.4425 | 6912     | 1 |
| Sorbitol                  | 28.6909 | 5780     | 1 |
| D-allose                  | 32.2984 | 12285879 | 2 |
| Gluconate                 | 29.2571 | 10690    | 2 |
| Uracil                    | 15.1452 | 1174     | 1 |
| Urate                     | 32.5264 | 1175     | 1 |
| Creatinine                | 21.2068 | 588      | 2 |
| Isoxanthopterin           | 33.0729 | 10729    | 2 |

---

<sup>a</sup> Identification level for metabolites according to Metabolomics Standards Initiative (MSI). 1: validation using reference standards; 2: identification using mass spectral library search.

## Supplementary materials

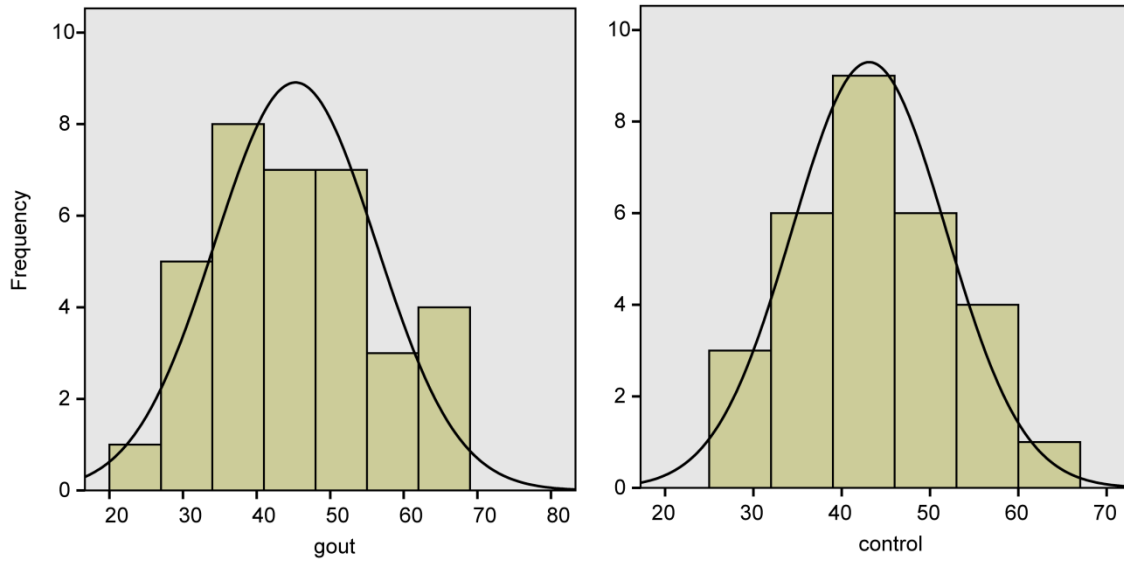

Fig. S1. The age distribution plot for gout patients and controls

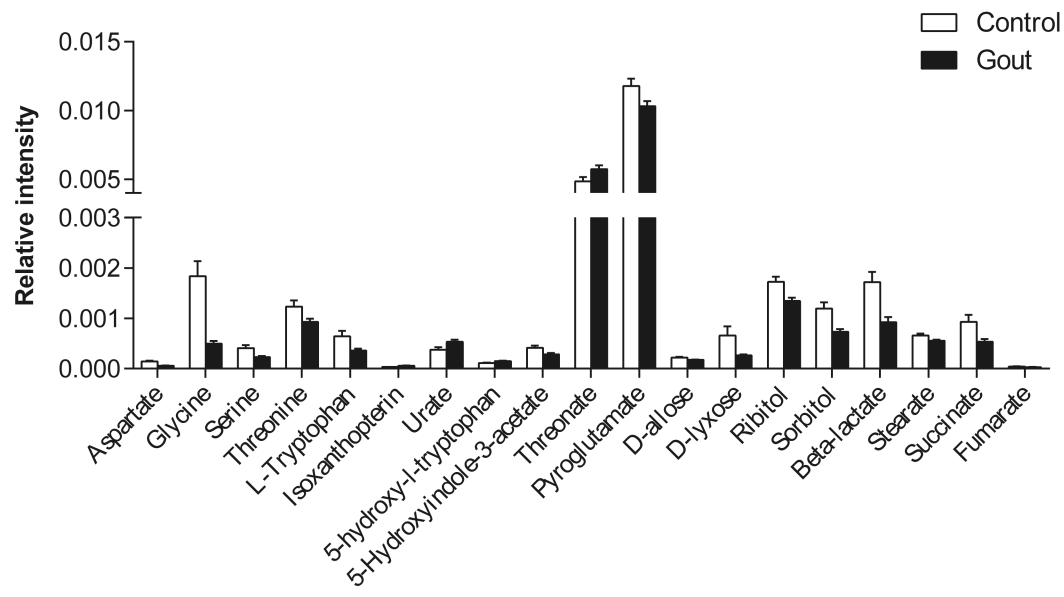

Fig. S2 The levels of important metabolites in the urine samples from gout patients and controls
